# Supplementary material
Source: Springer Nature journal article supplement (https://www.springermedizin.de/resource/supplementary/12943_2013_1512_MOESM3_ESM.pdf/9552308)

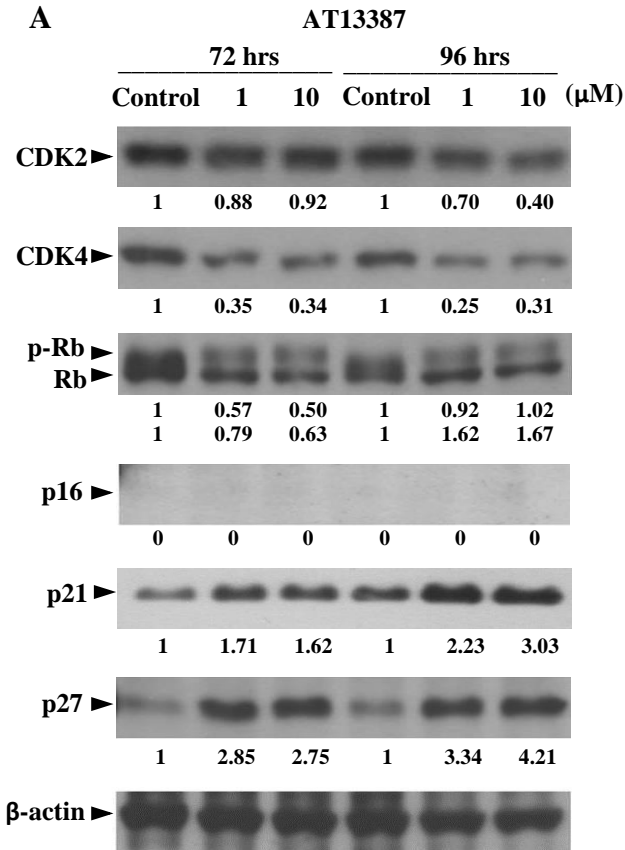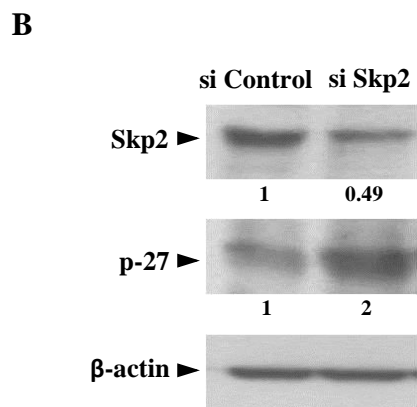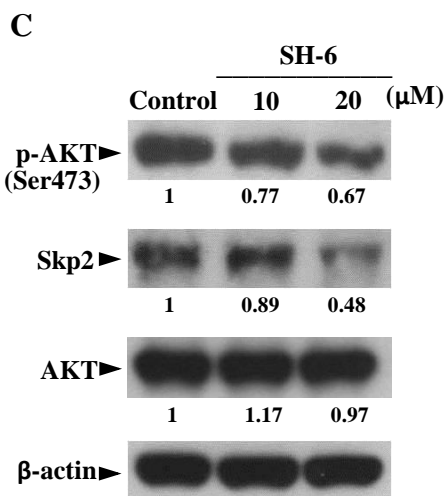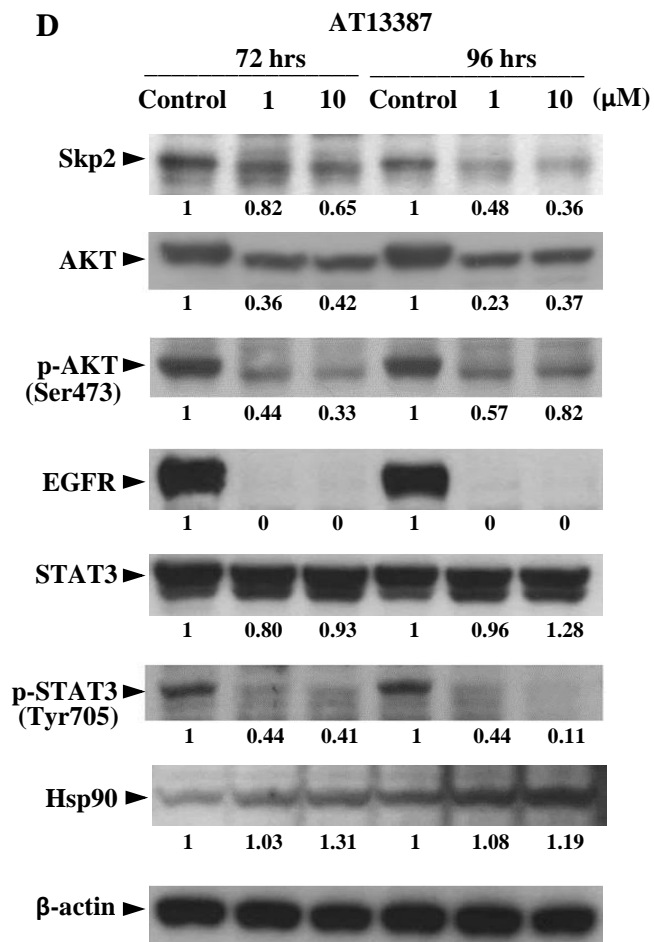

Supplement: MOESM3 [file 9552308]
